# Supplementary material
Source: PubMed Central journal article supplement (PMC10201921)
Supplement: NIHMS1865851-supplement-Supplemental_Digital_Content_2.pdf [file NIHMS1865851-supplement-Supplemental_Digital_Content_2.pdf]

## Appendix 1.

### Procedural Codes for Opioid Use Disorder (OUD) Treatment Services

| Coding System                                        | Procedural Code                                                                                                                                                       |
|------------------------------------------------------|-----------------------------------------------------------------------------------------------------------------------------------------------------------------------|
| HCPCS System                                         | H0001-H0050, H1000-H1005, H1010-H1011, H2000-H2001, H2010-H2011-H2019, H2020 <sup>a</sup> , H2021-H2037, T1002, T1006-T1007, T1012, T1016, T2048                      |
| CPT Codes                                            | 90791, 90832, 90834, 90837, 90839- 90840, 90845-90847, 90853 , 90801-90802, 90804, 90806, 90808, 90810, 90812, 90814, 90816, 90818, 90821, 90823, 90826, 90828 ,90857 |
| International Statistical Classification of Diseases | 9464, 9465 <sup>b</sup> , 9466-9467, 9468 <sup>c</sup> , 9469, HZ2ZZZZ <sup>d</sup> , HZ30ZZZ- HZ39ZZZ, HZ3BZZZ , HZ40ZZZ-HZ49ZZZ, HZ4BZZZ                            |

A refers to methadone administration. B-D refers to detoxification services. Services without a footnote denotes psychosocial treatment.

### National Drug Codes Used for Identification of OUD Pharmacy Claims for Buprenorphine

| Medication                                            | NDC Codes                                                                                                                                                                                                                                                                                                                                                                                                                                                                                                                                                                                                                                                                                                                                                |
|-------------------------------------------------------|----------------------------------------------------------------------------------------------------------------------------------------------------------------------------------------------------------------------------------------------------------------------------------------------------------------------------------------------------------------------------------------------------------------------------------------------------------------------------------------------------------------------------------------------------------------------------------------------------------------------------------------------------------------------------------------------------------------------------------------------------------|
| Buprenorphine Alone (Buprenorphine-Naloxone)          | 5401761, 54017713, 93537856, 93537956, 228315303, 228315603, 378092393, 378092493, 12496127802, 12496131002, 38779088800, 38779088801, 38779088803, 38779088809, 49452129203, 49452825301, 49452825302, 49452825303, 49452825304, 49999063830, 49999063930, 50383092493, 50383093093, 51927101200, 62991158301, 62991158302, 62991158303, 62991158304, 63275992202, 63370090506, 63370090509, 63370090510, 63370090515, 63874117303, 68308020830                                                                                                                                                                                                                                                                                                         |
| Buprenorphine Combination Product (Buprenorphine HCl) | 54018813, 54018913, 93572056, 93572156, 228315403, 228315473, 228315503, 228315573, 406192303, 406192403, 490005130, 12496120201, 12496120203, 12496120401,, 12496120403, 12496120801, 12496120803, 12496121201, 12496121203, 12496128302, 12496130602, 16590066630, 16590066730, 23490927003, 35356000430, 42291017430, 42291017530, 43063018430, 49999039515, 50383028793, 50383029493, 52959030430, 52959074930, 54123011430, 54123091430, 54123092930, 54123095730, 54123098630,, 54569573900, 54569573901, 54569573902, 54569639900, 54868570700, 54868570701, 54868575000, 55700014730, 59385001201, 59385001230, 59385001401, 59385001430, 59385001601, 59385001630, 60429058630, 60429058730, 63874108503, 65162041503, 65162041603, 68071151003 |

Xu KY, Jones HE, Schif DM, Martin CE, Kelly JC, Carter EB, et al. Medication initiation and treatment discontinuation in pregnant compared with nonpregnant people. *Obstet Gynecol* 2023;141.

The authors provided this information as a supplement to their article.

©2023 American College of Obstetricians and Gynecologists.

## Appendix 2. Current Procedural Terminology Codes Used to Identify Inpatient and Outpatient Deliveries

| Medication | CPT Codes                                                                                                                                                                                                         |
|------------|-------------------------------------------------------------------------------------------------------------------------------------------------------------------------------------------------------------------|
| ICD-9      | 01960, 01961 , 01962, 01963 , 01967 , 01968 , 01969 , 59050 , 59051, 59400 , 59409 , 59410 , 59412 , 59414 , 59430 , 59510 , 59514 , 59515 , 59525 , 59610 ,59612 , 59614 , 59618 , 59620 , 59622 , 99436 , 99440 |
| ICD-10     | 72 , 72.0 , 72.1 , 72.2 , 72.21 , 72.29 , 72.3 , 72.31                                                                                                                                                            |

Xu KY, Jones HE, Schif DM, Martin CE, Kelly JC, Carter EB, et al. Medication initiation and treatment discontinuation in pregnant compared with nonpregnant people. *Obstet Gynecol* 2023;141.

The authors provided this information as a supplement to their article.

©2023 American College of Obstetricians and Gynecologists.

### Appendix 3.

#### Unadjusted Logistic Regression Models for the Association Between Pregnancy and MOUD Initiation

| Buprenorphine                                                                                             | Odds Ratio | 95% Confidence Limits |      | P-value |
|-----------------------------------------------------------------------------------------------------------|------------|-----------------------|------|---------|
| Among all individuals<br>Pregnant v Not-Pregnant Status, Among all Treatment Episodes, n=155,771 episodes | 1.12       | 1.04                  | 1.20 | <.0001  |

| Methadone                                                                                                 | Odds Ratio | 95% Confidence Limits |      | P-value |
|-----------------------------------------------------------------------------------------------------------|------------|-----------------------|------|---------|
| Among all individuals<br>Pregnant v Not-Pregnant Status, Among all Treatment Episodes, n=155,771 episodes | 2.45       | 2.21                  | 2.73 | <.0001  |

#### Adjusted Logistic Regression Models for the Association Between Pregnancy and MOUD Initiation

| Buprenorphine                                                                                                                                                                                             | Odds Ratio | 95% Confidence Limits |      | P-value |
|-----------------------------------------------------------------------------------------------------------------------------------------------------------------------------------------------------------|------------|-----------------------|------|---------|
| Among all individuals<br>Model 1, Pregnant v Not-Pregnant Status, Among all Treatment Episodes, n=155,771 episodes                                                                                        | 1.57       | 1.44                  | 1.70 | <.0001  |
| Excluding commercial enrollees , as race/ethnicity data is only available among Medicaid enrollees<br>Model 2, Pregnant v Not-Pregnant Status, Among All Treatment Episodes, n=155,771 episodes           | 1.66       | 1.52                  | 1.81 | <.0001  |
| Among all individuals<br>Model 3, Pregnant v Not-Pregnant Status, One Episode Per Person (First Episode), n=101,772 episodes                                                                              | 1.50       | 1.37                  | 1.63 | <.0001  |
| Excluding commercial enrollees , as race/ethnicity data is only available among Medicaid enrollees<br>Model 4, Pregnant v Not-Pregnant Status, One Episode Per Person (First Episode), n=101,772 episodes | 1.57       | 1.43                  | 1.72 | <.0001  |
| Among all individuals<br>Model 5, Pregnant v Not-Pregnant Status, One Pregnancy Per Person, n=155,554 episodes                                                                                            | 1.66       | 1.53                  | 1.80 | <.0001  |
| Excluding commercial enrollees , as race/ethnicity data is only available among Medicaid enrollees<br>Model 6, Pregnant v Not-Pregnant Status, One Pregnancy Per Person, n=155,554 episodes               | 1.75       | 1.60                  | 1.91 | <.0001  |

| Methadone                                                                                                          | Odds Ratio | 95% Confidence Limits |      | P-value |
|--------------------------------------------------------------------------------------------------------------------|------------|-----------------------|------|---------|
| Among all individuals<br>Model 1, Pregnant v Not-Pregnant Status, Among all Treatment Episodes, n=155,771 episodes | 2.04       | 1.82                  | 2.27 | <.0001  |
| Excluding commercial enrollees , as race/ethnicity data is only available among Medicaid enrollees                 | 2.01       | 1.79                  | 2.26 | <.0001  |

Xu KY, Jones HE, Schif DM, Martin CE, Kelly JC, Carter EB, et al. Medication initiation and treatment discontinuation in pregnant compared with nonpregnant people. *Obstet Gynecol* 2023;141.

The authors provided this information as a supplement to their article.

©2023 American College of Obstetricians and Gynecologists.

|                                                                                                                                                                                                           |      |      |      |        |
|-----------------------------------------------------------------------------------------------------------------------------------------------------------------------------------------------------------|------|------|------|--------|
| Model 2, Pregnant v Not-Pregnant Status, Among All Treatment Episodes, n=155,771 episodes                                                                                                                 |      |      |      |        |
| Among all individuals<br>Model 3, Pregnant v Not-Pregnant Status, One Episode Per Person (First Episode), n=101,772 episodes                                                                              | 1.97 | 1.76 | 2.22 | <.0001 |
| Excluding commercial enrollees , as race/ethnicity data is only available among Medicaid enrollees<br>Model 4, Pregnant v Not-Pregnant Status, One Episode Per Person (First Episode), n=101,772 episodes | 1.96 | 1.74 | 2.21 | <.0001 |
| Among all individuals<br>Model 5, Pregnant v Not-Pregnant Status, One Pregnancy Per Person, n=155,554 episodes                                                                                            | 2.09 | 1.88 | 2.34 | <.0001 |
| Excluding commercial enrollees , as race/ethnicity data is only available among Medicaid enrollees<br>Model 6, Pregnant v Not-Pregnant Status, One Pregnancy Per Person, n=155,554 episodes               | 2.07 | 1.85 | 2.32 | <.0001 |

Among all individuals

Models 1, 3, 5: Logistic regression models controlling for age, insurance status, co-occurring substance use disorders (alcohol, cannabis, sedative, stimulant, tobacco), co-occurring anxiety disorders, co-occurring psychotic disorders, co-occurring mood (bipolar, major depression) disorders

Excluding commercial enrollees , as race/ethnicity data is only available among Medicaid enrollees

Models 2, 4, 6: Logistic regression models controlling for age, race (**among Medicaid**), co-occurring substance use disorders (alcohol, cannabis, sedative, stimulant, tobacco), co-occurring anxiety disorders, co-occurring psychotic disorders, co-occurring mood (bipolar, major depression) disorders

## Appendix 4.

### Unadjusted Cox Regression Models for the Association Between Pregnancy and MOUD Discontinuation

| Buprenorphine                                                                                             | Hazard Ratio | 95% Confidence Limits |      | P-value |
|-----------------------------------------------------------------------------------------------------------|--------------|-----------------------|------|---------|
| Among all individuals<br>Pregnant v Not-Pregnant Status, Among all Treatment Episodes, n=155,771 episodes | 0.79         | 0.75                  | 0.84 | <.0001  |

  

| Methadone                                                                                                 | Hazard Ratio | 95% Confidence Limits |      | P-value |
|-----------------------------------------------------------------------------------------------------------|--------------|-----------------------|------|---------|
| Among all individuals<br>Pregnant v Not-Pregnant Status, Among all Treatment Episodes, n=155,771 episodes | 0.71         | 0.64                  | 0.78 | <.0001  |

### Adjusted Cox Regression Models for the Association Between Pregnancy and MOUD Discontinuation

| Buprenorphine                                                                                                                                                                                             | Hazard Ratio | 95% Confidence Limits |      | P-value |
|-----------------------------------------------------------------------------------------------------------------------------------------------------------------------------------------------------------|--------------|-----------------------|------|---------|
| Among all individuals<br>Model 1, Pregnant v Not-Pregnant Status, Among all Treatment Episodes, n=155,771 episodes                                                                                        | 0.71         | 0.67                  | 0.76 | <.0001  |
| Excluding commercial enrollees , as race/ethnicity data is only available among Medicaid enrollees<br>Model 2, Pregnant v Not-Pregnant Status, Among All Treatment Episodes, n=155,771 episodes           | 0.71         | 0.66                  | 0.77 | <.0001  |
| Among all individuals<br>Model 3, Pregnant v Not-Pregnant Status, One Episode Per Person (First Episode) , n=101,772 episodes                                                                             | 0.68         | 0.63                  | 0.73 | <.0001  |
| Excluding commercial enrollees , as race/ethnicity data is only available among Medicaid enrollees<br>Model 4, Pregnant v Not-Pregnant Status, One Episode Per Person (First Episode), n=101,772 episodes | 0.61         | 0.56                  | 0.67 | <.0001  |
| Among all individuals<br>Model 5, Pregnant v Not-Pregnant Status, One Pregnancy Per Person, n=155,554 episodes                                                                                            | 0.71         | 0.67                  | 0.75 | <.0001  |
| Excluding commercial enrollees , as race/ethnicity data is only available among Medicaid enrollees<br>Model 6, Pregnant v Not-Pregnant Status, One Pregnancy Per Person, n=155,554 episodes               | 0.71         | 0.66                  | 0.76 | <.0001  |

| Methadone                                                                                                          | Hazard Ratio | 95% Confidence Limits |      | P-value |
|--------------------------------------------------------------------------------------------------------------------|--------------|-----------------------|------|---------|
| Among all individuals<br>Model 1, Pregnant v Not-Pregnant Status, Among all Treatment Episodes, n=155,771 episodes | 0.68         | 0.61                  | 0.75 | <.0001  |
| Excluding commercial enrollees , as race/ethnicity data is only available among Medicaid enrollees                 | 0.66         | 0.59                  | 0.73 | <.0001  |

Xu KY, Jones HE, Schif DM, Martin CE, Kelly JC, Carter EB, et al. Medication initiation and treatment discontinuation in pregnant compared with nonpregnant people. *Obstet Gynecol* 2023;141.

The authors provided this information as a supplement to their article.

©2023 American College of Obstetricians and Gynecologists.

|                                                                                                      |      |      |      |        |
|------------------------------------------------------------------------------------------------------|------|------|------|--------|
| Model 2, Pregnant v Not-Pregnant Status, Among All Treatment Episodes, n=155,771 episodes            |      |      |      |        |
| Among all individuals                                                                                |      |      |      |        |
| Model 3, Pregnant v Not-Pregnant Status, One Episode Per Person (First Episode) , n=101,772 episodes | 0.50 | 0.44 | 0.57 | <.0001 |
| Excluding commercial enrollees , as race/ethnicity data is only available among Medicaid enrollees   |      |      |      |        |
| Model 4, Pregnant v Not-Pregnant Status, One Episode Per Person (First Episode), n=101,772 episodes  | 0.48 | 0.42 | 0.55 | <.0001 |
| Among all individuals                                                                                |      |      |      |        |
| Model 5, Pregnant v Not-Pregnant Status, One Pregnancy Per Person, n=155,554 episodes                | 0.69 | 0.62 | 0.76 | <.0001 |
| Excluding commercial enrollees , as race/ethnicity data is only available among Medicaid enrollees   |      |      |      |        |
| Model 6, Pregnant v Not-Pregnant Status, One Pregnancy Per Person, n=155,554 episodes                | 0.67 | 0.60 | 0.75 | <.0001 |

Among all individuals

Models 1, 3, 5: Cox regression models controlling for age, insurance status, co-occurring substance use disorders (alcohol, cannabis, sedative, stimulant, tobacco), co-occurring anxiety disorders, co-occurring psychotic disorders, co-occurring mood (bipolar, major depression) disorders

Excluding commercial enrollees , as race/ethnicity data is only available among Medicaid enrollees

Models 2, 4, 6: Cox regression models controlling for age, race, co-occurring substance use disorders (alcohol, cannabis, sedative, stimulant, tobacco), co-occurring anxiety disorders, co-occurring psychotic disorders, co-occurring mood (bipolar, major depression) disorders
